# Supplementary material for: Zinc for the prevention or treatment of acute viral respiratory tract infections in adults: a rapid systematic review and meta-analysis of randomised controlled trials
Source: HighWire-hosted journal article supplement (doi:10.1136/bmjopen-2020-047474), 2021-10-01
Supplement: bmjopen-2020-047474supp003_data_supplement.pdf [file bmjopen-2020-047474supp003_data_supplement.pdf]

## Appendix 3: Characteristics of studies, funding of studies, risk of bias

### CONTENTS

|                                                        |    |
|--------------------------------------------------------|----|
| Table 1: Characteristics of studies .....              | 1  |
| Table 2: Funding of studies .....                      | 8  |
| Figure 1: Risk of bias for each outcome category ..... | 9  |
| Table 3: Risk of bias for each study outcome .....     | 10 |
| References .....                                       | 16 |

**Table 1: Characteristics of studies**

| Study ID                           | Country<br>Setting<br>Study design                 | Participants<br>Age (mean $\pm$ SD)<br>Risk factors*                                                                                                                                                              | Zinc Intervention<br>(elemental<br>dose/day)<br>No. enrolled (CAA)                                                                                           | Comparator<br>No. enrolled (CAA)                                                                                                                           | Outcomes assessed<br>Follow-up time                                                                                                                                                                                                                                    |
|------------------------------------|----------------------------------------------------|-------------------------------------------------------------------------------------------------------------------------------------------------------------------------------------------------------------------|--------------------------------------------------------------------------------------------------------------------------------------------------------------|------------------------------------------------------------------------------------------------------------------------------------------------------------|------------------------------------------------------------------------------------------------------------------------------------------------------------------------------------------------------------------------------------------------------------------------|
| <b>SAFETY / TOLERABILITY</b>       |                                                    |                                                                                                                                                                                                                   |                                                                                                                                                              |                                                                                                                                                            |                                                                                                                                                                                                                                                                        |
| <i>Zinc versus placebo control</i> |                                                    |                                                                                                                                                                                                                   |                                                                                                                                                              |                                                                                                                                                            |                                                                                                                                                                                                                                                                        |
| Silk<br>2005 <sup>1</sup>          | US<br>Community<br>Single centre<br>2-arm RCT      | Older adults<br>Age: 60-91 years<br>(68.4 $\pm$ 7 yrs)<br><i>chronic diseases</i><br>n=66                                                                                                                         | Lozenge: zinc<br>gluconate glycine<br>(Cold-Eeze®)<br>Zinc dose:<br><79.8mg/day for 6<br>days<br>N=NI (33)                                                   | Placebo lozenge: NI<br>for 6 days<br>N=NI (33)                                                                                                             | 1. AEs: PRO assessed on day 7 and 14<br>2. Medications: day 7 and 14<br>3. Vital signs: day 1 and 7<br>4. AEs: laboratory tests (full blood<br>count, electrolytes, kidney function,<br>urine chemistry) on day 7<br>14 days                                           |
| Al Nakib<br>1987 (C) <sup>2</sup>  | UK<br>Isolation unit<br>Single centre<br>2-arm RCT | Healthy adults<br>Age: 18-50 years<br>(Zinc 31.5 yrs;<br>Control 29.4 yrs)<br>HRV-2<br>inoculation<br>(n=10),<br>placebo saline<br>inoculation (n=8)                                                              | Lozenge: 23mg zinc<br>gluconate<br>1 every 2 waking<br>hours<br>up to 12 daily<br>(279mg)<br>from 24 hours prior<br>to inoculation, for 5<br>days<br>N=7 (7) | Placebo lozenge:<br>matched<br>appearance,<br>excipients<br>1 every 2 waking<br>hours<br>from 24 hours prior<br>to inoculation, for 5<br>days<br>N=11 (11) | 1. Tolerability – taste<br>2. AEs (biochemical, haematological<br>changes)<br>day 3-4                                                                                                                                                                                  |
| <b>PREVENTION ONLY</b>             |                                                    |                                                                                                                                                                                                                   |                                                                                                                                                              |                                                                                                                                                            |                                                                                                                                                                                                                                                                        |
| <i>Zinc versus placebo control</i> |                                                    |                                                                                                                                                                                                                   |                                                                                                                                                              |                                                                                                                                                            |                                                                                                                                                                                                                                                                        |
| Prasad<br>2007 <sup>3</sup>        | US<br>Community<br>Single centre<br>2-arm RCT      | Older adults<br>Age: 55-87 years<br>(Zinc 65 $\pm$ 9 yrs,<br>Control 68 $\pm$ 7<br>yrs)<br>>70 years age<br>n=19<br><i>influenza vaccine</i><br>n=37<br><i>chronic diseases</i><br>n=9<br><i>medications</i> n=17 | Capsule: 15mg zinc<br>gluconate<br>2 morning, 1 night<br>45mg / day<br>for 12 months<br>N=25 (24)                                                            | Placebo capsule:<br>matched<br>appearance,<br>excipients<br>2 morning, 1 night<br>for 12 months<br>N=25 (25)                                               | Incidence rate:<br>1. Any infection <sup>4</sup><br>2. URTI: rhinitis, sinusitis, or<br>bronchitis<br>3. Tonsillitis<br>4. Common cold: based on 7<br>symptoms<br>5. Cold sores<br>6. Flu-like illness<br>7. Fever<br>(self-recall and nurse practitioner<br>assessed) |
