# Supplementary material for: Zinc for the prevention or treatment of acute viral respiratory tract infections in adults: a rapid systematic review and meta-analysis of randomised controlled trials
Source: HighWire-hosted journal article supplement (doi:10.1136/bmjopen-2020-047474), 2021-10-01
Supplement: bmjopen-2020-047474supp004_data_supplement.pdf [file bmjopen-2020-047474supp004_data_supplement.pdf]

## Appendix 3: Characteristics of studies, funding of studies, risk of bias

### CONTENTS

|                                                        |    |
|--------------------------------------------------------|----|
| Table 1: Characteristics of studies .....              | 1  |
| Table 2: Funding of studies .....                      | 8  |
| Figure 1: Risk of bias for each outcome category ..... | 9  |
| Table 3: Risk of bias for each study outcome .....     | 10 |
| References .....                                       | 16 |

Table 1: Characteristics of studies

| Study ID                           | Country<br>Setting<br>Study design                 | Participants<br>Age (mean $\pm$ SD)<br>Risk factors*                                                                                                                                                                                   | Zinc Intervention<br>(elemental<br>dose/day)<br>No. enrolled (CAA)                                                                                           | Comparator<br>No. enrolled (CAA)                                                                                                                           | Outcomes assessed<br>Follow-up time                                                                                                                                                                                                                                    |
|------------------------------------|----------------------------------------------------|----------------------------------------------------------------------------------------------------------------------------------------------------------------------------------------------------------------------------------------|--------------------------------------------------------------------------------------------------------------------------------------------------------------|------------------------------------------------------------------------------------------------------------------------------------------------------------|------------------------------------------------------------------------------------------------------------------------------------------------------------------------------------------------------------------------------------------------------------------------|
| <b>SAFETY / TOLERABILITY</b>       |                                                    |                                                                                                                                                                                                                                        |                                                                                                                                                              |                                                                                                                                                            |                                                                                                                                                                                                                                                                        |
| <b>Zinc versus placebo control</b> |                                                    |                                                                                                                                                                                                                                        |                                                                                                                                                              |                                                                                                                                                            |                                                                                                                                                                                                                                                                        |
| Silk<br>2005 <sup>1</sup>          | US<br>Community<br>Single centre<br>2-arm RCT      | Older adults<br>Age: 60-91 years<br>(68.4 $\pm$ 7 yrs)<br><i>chronic diseases</i><br><i>n=66</i>                                                                                                                                       | Lozenge: zinc<br>gluconate glycine<br>(Cold-Eeze®)<br>Zinc dose:<br><79.8mg/day for 6<br>days<br>N=NI (33)                                                   | Placebo lozenge: NI<br>for 6 days<br>N=NI (33)                                                                                                             | 1. AEs: PRO assessed on day 7 and 14<br>2. Medications: day 7 and 14<br>3. Vital signs: day 1 and 7<br>4. AEs: laboratory tests (full blood<br>count, electrolytes, kidney function,<br>urine chemistry) on day 7<br>14 days                                           |
| Al Nakib<br>1987 (C) <sup>2</sup>  | UK<br>Isolation unit<br>Single centre<br>2-arm RCT | Healthy adults<br>Age: 18-50 years<br>(Zinc 31.5 yrs;<br>Control 29.4 yrs)<br>HRV-2<br>inoculation<br>(n=10),<br>placebo saline<br>inoculation (n=8)                                                                                   | Lozenge: 23mg zinc<br>gluconate<br>1 every 2 waking<br>hours<br>up to 12 daily<br>(279mg)<br>from 24 hours prior<br>to inoculation, for 5<br>days<br>N=7 (7) | Placebo lozenge:<br>matched<br>appearance,<br>excipients<br>1 every 2 waking<br>hours<br>from 24 hours prior<br>to inoculation, for 5<br>days<br>N=11 (11) | 1. Tolerability – taste<br>2. AEs (biochemical, haematological<br>changes)<br>day 3-4                                                                                                                                                                                  |
| <b>PREVENTION ONLY</b>             |                                                    |                                                                                                                                                                                                                                        |                                                                                                                                                              |                                                                                                                                                            |                                                                                                                                                                                                                                                                        |
| <b>Zinc versus placebo control</b> |                                                    |                                                                                                                                                                                                                                        |                                                                                                                                                              |                                                                                                                                                            |                                                                                                                                                                                                                                                                        |
| Prasad<br>2007 <sup>3</sup>        | US<br>Community<br>Single centre<br>2-arm RCT      | Older adults<br>Age: 55-87 years<br>(Zinc 65 $\pm$ 9 yrs,<br>Control 68 $\pm$ 7<br>yrs)<br>>70 years age<br><i>n=19</i><br><i>influenza vaccine</i><br><i>n=37</i><br><i>chronic diseases</i><br><i>n=9</i><br><i>medications n=17</i> | Capsule: 15mg zinc<br>gluconate<br>2 morning, 1 night<br>45mg / day<br>for 12 months<br>N=25 (24)                                                            | Placebo capsule:<br>matched<br>appearance,<br>excipients<br>2 morning, 1 night<br>for 12 months<br>N=25 (25)                                               | Incidence rate:<br>1. Any infection <sup>4</sup><br>2. URTI: rhinitis, sinusitis, or<br>bronchitis<br>3. Tonsillitis<br>4. Common cold: based on 7<br>symptoms<br>5. Cold sores<br>6. Flu-like illness<br>7. Fever<br>(self-recall and nurse practitioner<br>assessed) |

|                                    |                                                                             |                                                                                                                                  |                                                                                                                                                                                           |                                                                                                                                                                                    |                                                                                                                                                                                                                                                                                                                                                                                                                                                                                                                |
|------------------------------------|-----------------------------------------------------------------------------|----------------------------------------------------------------------------------------------------------------------------------|-------------------------------------------------------------------------------------------------------------------------------------------------------------------------------------------|------------------------------------------------------------------------------------------------------------------------------------------------------------------------------------|----------------------------------------------------------------------------------------------------------------------------------------------------------------------------------------------------------------------------------------------------------------------------------------------------------------------------------------------------------------------------------------------------------------------------------------------------------------------------------------------------------------|
|                                    |                                                                             | <i>ethnicity: African American n=12, Hispanic n=1</i><br>Zinc deficiency excluded                                                |                                                                                                                                                                                           |                                                                                                                                                                                    | 8. Ex vivo generation of inflammatory markers and T cell cytokine production at 6 and 12 months<br>9. Plasma molecular markers of oxidative stress at 6 months<br>10. Plasma zinc at 12 months<br>11. AEs: plasma copper at 12 months<br><i>12 months</i>                                                                                                                                                                                                                                                      |
| Veverka 2009 <sup>5</sup>          | US<br>Air Force Academy<br>Single centre<br>2-arm RCT                       | Healthy adults (Zinc 18.5 ± 9 yrs, Control 18.6 ± 8 yrs)<br>Zinc deficiency excluded                                             | Capsule: 15mg zinc gluconate<br>1 daily (15mg)<br><i>for 7 months</i><br>N=20 (15)                                                                                                        | Placebo capsule: matched appearance<br>1 daily<br><i>for 7 months</i><br>N=20 (15)                                                                                                 | 1. Incidence: URTI, physician diagnosed<br>2. Incidence: Common cold according to weekly self-recall of 8 symptoms, 0-3 scale, as per Takkouche criteria <sup>6</sup><br>2. Duration: weeks with self-reported symptoms<br>3. Plasma zinc at 7 months<br>4. AEs: plasma copper at 7 months<br>4. AEs: reported (ad hoc) for 7 months<br><i>7 months</i>                                                                                                                                                        |
| Wei 2009 <sup>7</sup>              | China<br>Army boot camp<br>Single centre<br>2-arm RCT<br>2 parallel samples | Healthy males 18-22 years (Zinc 18.0 ± 0.4 yrs, Control 18.0 ± 0.4 yrs)                                                          | Nasal spray: zinc gluconate<br>0.29mg / spray<br>2 sprays, twice a day<br>(1.15mg)<br><i>for 1 month</i><br>N=447 (386)                                                                   | Placebo nasal spray: matched colour, smell, excipients<br>2 sprays, twice a day<br><i>for 1 month</i><br>N=454 (387)                                                               | Incidence of:<br>1. URTI: ≥2 days duration and ≥3 of 15 symptoms including appetite, nausea, vomiting or diarrhoea<br>2. Flu-like illness: fever >38.0C and sore throat or cough<br>3. AEs: PRO assessed daily<br><i>1 month</i>                                                                                                                                                                                                                                                                               |
| Zhang 2009 <sup>8</sup>            | China<br>Community<br>Single centre<br>2-arm RCT<br>4 parallel samples      | Healthy adult college students (Zinc 19 ± 1.5 yrs, Control 19 ± 1.6 yrs)                                                         | Nasal spray: zinc gluconate<br>0.29mg / spray<br>2 sprays, twice a day<br>(1.15mg)<br><i>for 1 month</i><br>N=1,000 (978)                                                                 | Placebo nasal spray: matched excipients<br>2 sprays, twice a day<br><i>for 1 month</i><br>N=1,000 (967)                                                                            | Incidence of:<br>1. URTI: ≥2 days duration and ≥3 of 11 symptoms<br>2. Flu-like illness: fever >37.8C and sore throat or cough (cited United States CDC definition)<br>3. AEs: PRO assessed daily<br><i>1 month</i>                                                                                                                                                                                                                                                                                            |
| <b>PREVENTION &amp; TREATMENT</b>  |                                                                             |                                                                                                                                  |                                                                                                                                                                                           |                                                                                                                                                                                    |                                                                                                                                                                                                                                                                                                                                                                                                                                                                                                                |
| <b>Zinc versus placebo control</b> |                                                                             |                                                                                                                                  |                                                                                                                                                                                           |                                                                                                                                                                                    |                                                                                                                                                                                                                                                                                                                                                                                                                                                                                                                |
| Al Nakib 1987 (A) <sup>2</sup>     | UK<br>Isolation unit<br>Single centre<br>2-arm RCT                          | Healthy adults<br>Age: 18-50 years (Zinc 31.5 yrs Control 29.4 yrs)<br>HRV-2 inoculation<br>Clinical cold: investigator assessed | Lozenge: 23mg zinc gluconate<br>1 every 2 waking hours<br>up to 12 daily (279mg)<br><i>from 24 hours prior to inoculation, for 5 days</i><br>N=29 (29)<br>prevention<br>N=6 (6) treatment | Placebo lozenge: matched appearance, excipients<br>1 every 2 waking hours<br><i>from 24 hours prior to inoculation, for 5 days</i><br>N=28 (28)<br>prevention<br>N=8 (8) treatment | 1. Incidence: viral infection (HRV-2) isolated nasal swabs on day 3 and 7 and/or 4-fold rise in antibody titre on day 21<br>2. Incidence: clinical cold, investigator rated mild, moderate or severe<br>3. Severity: 4 symptoms, 0-3 scale, investigator rated daily for 6 days<br>4. Severity: daily nasal viral titres for 6 days<br>5. Severity: daily nasal mucus weight for 6 days<br>6. Severity: daily total tissue-count for 6 days<br>7. Zinc concentration: urine-analyses day 3-4<br><i>21 days</i> |
| Farr 1987 (A) <sup>9</sup>         | US<br>Hotel isolation<br>Single centre<br>2-arm RCT                         | Healthy adults (Zinc 21.4 ± 2.4 yrs, Control 20.6 ± 1.9 yrs.)<br>Clinical cold following HRV-39                                  | Lozenge: 23mg zinc gluconate (citric acid)<br>up to 8 / day (184mg)                                                                                                                       | Placebo lozenge: citric acid, matched appearance.<br>up to 8 / day<br><i>from 36 hours after inoculation for 5 days</i>                                                            | 1. Incidence: viral infection (HRV-39) isolated nasal swabs on days 2 to 7 and/or 4-fold rise in antibody titre on day 21<br>2. Incidence clinical cold, <sup>10</sup> investigator rated                                                                                                                                                                                                                                                                                                                      |

|                                                            |                                                        |                                                                                                                                                                                                     |                                                                                                                                                                                               |                                                                                                                                                                             |                                                                                                                                                                                                                                                                                                                                                                                                                                                                                                                                                                                                                                                      |
|------------------------------------------------------------|--------------------------------------------------------|-----------------------------------------------------------------------------------------------------------------------------------------------------------------------------------------------------|-----------------------------------------------------------------------------------------------------------------------------------------------------------------------------------------------|-----------------------------------------------------------------------------------------------------------------------------------------------------------------------------|------------------------------------------------------------------------------------------------------------------------------------------------------------------------------------------------------------------------------------------------------------------------------------------------------------------------------------------------------------------------------------------------------------------------------------------------------------------------------------------------------------------------------------------------------------------------------------------------------------------------------------------------------|
|                                                            |                                                        | inoculation: symptoms as per Jackson criteria, <sup>10</sup> or subjective belief of having a cold                                                                                                  | <i>from 36 hours after inoculation for 5 days</i><br>N=13 (13) cold symptoms                                                                                                                  | N=12 (12) cold symptoms                                                                                                                                                     | 3. Duration: viral shedding on days 2-7<br>4. Severity: 7 symptoms, 0-3 scale, <sup>10</sup> investigator rated daily on days 1-7, self-reported on days 8-14<br>5. Severity: nasal mucus weight on days 1-7<br>6. Severity: daily tissue counts on days 1-5<br>7. Serum zinc and biochemistry, blood count, urinalysis on day 7<br>8. AEs: serum copper on day 7<br>9. AEs: daily PRO assessed daily on days 1-7 and exit interview between day 8 to 14<br><i>21 days</i>                                                                                                                                                                           |
| Farr 1987 (B) <sup>9</sup>                                 | US<br>Hotel<br>isolation<br>Single centre<br>2-arm RCT | Healthy adults (Zinc 21.1 ±2.2 yrs.<br>Control 21.1 ±2.8 yrs.)<br>Clinical cold following HRV-13 inoculation: symptoms as per Jackson criteria, <sup>10</sup> or subjective belief of having a cold | Lozenge: 23mg zinc gluconate (citric acid)<br>up to 8 / day (184mg)<br><i>from 2 hours after inoculation for 7 days</i><br>N=NI (13) treatment                                                | Placebo lozenge: matched appearance<br>up to 8 / day<br><i>from 2 hours after inoculation for 7 days</i><br>N=NI (16) treatment                                             | 1. Incidence: viral infection (HRV-39) isolated nasal swabs on days 2 to 7 and/or 4-fold rise in antibody titre on day 21<br>2. Incidence clinical cold, <sup>10</sup> investigator rated<br>3. Duration: viral shedding on days 2-8<br>4. Severity: 7 symptoms, 0-3 scale, <sup>10</sup> investigator rated twice daily for 7 days, and self-rated following discharge on days 9-14<br>5. Severity: daily viral nasal titres days 2-8<br>6. Severity: nasal mucus weights for 7 days<br>7. Serum zinc and biochemistry, blood count, urinalysis on day 7<br>8. AEs: serum copper on day 7<br>9. AEs: PRO assessed daily for 7 days<br><i>7 days</i> |
| Turner 2001 <sup>11</sup>                                  | US<br>Community<br>Single centre<br>2-arm RCT          | Healthy adults inoculated with HRV-23 (n=56) or HRV-39 (n=35)                                                                                                                                       | Nasal gel: zinc gluconate (Zicam®) 33 mM<br>120 µL / squirt<br>2 squirts 5 x day (2.6mg)<br><i>from 3 days prior to inoculation for 5 days</i><br>N=41 (41) prevention<br>N=30 (30) treatment | Placebo nasal gel: matched appearance, excipients<br>2 squirts 5 x day<br><i>from 3 days prior to inoculation for 5 days</i><br>N=50 (50) prevention<br>N=36 (36) treatment | 1. Incidence: viral infection (HRV23 or HRV39) isolated from nasal lavage on days 0-5, or 4-fold rise in antibody titre on day 21<br>2. Incidence: clinical cold total, investigator assessed symptom score ≥6 plus 3 days rhinorrhoea, or self-determined diagnosis<br>3. Severity: 8 symptoms, 0-4 scale, investigator rated daily for 5 days<br>4. Severity: nasal viral titre, daily for 5 days<br>5. AEs: PRO assessed daily for 5 days<br><i>21 days</i>                                                                                                                                                                                       |
| <b>TREATMENT ONLY</b><br><b>Zinc versus active control</b> |                                                        |                                                                                                                                                                                                     |                                                                                                                                                                                               |                                                                                                                                                                             |                                                                                                                                                                                                                                                                                                                                                                                                                                                                                                                                                                                                                                                      |
| Turner 2000 (A) <sup>12</sup>                              | US<br>Hotel<br>isolation<br>Multi centre<br>4-arm RCT  | Healthy adults<br>Age: 18-65 years<br>HRV-39<br>inoculation<br>Clinical cold: total daily symptom score ≥3 within 48 hrs of inoculation,                                                            | Lozenge: Arm-1 zinc gluconate 13.3mg (Cold-Eeze®), Arm-2 zinc acetate 5mg, Arm-3 zinc acetate 11.5mg<br>1 every 2 waking hours                                                                | Placebo lozenge: unmatched, quinine hydrochloride, tannic acid, sucrose octaacetate, sugar, glucose syrup<br>1 every 2 waking hours                                         | 1. Duration: time up to 14 days, until two consecutive symptom scores ≤1 within 24 hours<br>2. Severity: 7 symptoms, 0-4 scale, self-rated twice daily for up to 14 days<br>3. Severity: viral IL-8 concentrations in nasal lavage, daily for 5 days (post hoc, at one centre only)                                                                                                                                                                                                                                                                                                                                                                  |

|                                    |                                           |                                                                                                                            |                                                                                                                                                                                                                          |                                                                                                                                                                              |                                                                                                                                                                                                                                                                                                                                                                                                                                                           |
|------------------------------------|-------------------------------------------|----------------------------------------------------------------------------------------------------------------------------|--------------------------------------------------------------------------------------------------------------------------------------------------------------------------------------------------------------------------|------------------------------------------------------------------------------------------------------------------------------------------------------------------------------|-----------------------------------------------------------------------------------------------------------------------------------------------------------------------------------------------------------------------------------------------------------------------------------------------------------------------------------------------------------------------------------------------------------------------------------------------------------|
|                                    |                                           | investigator assessed. (N=273 randomised, confirmed HRV infection n=118)                                                   | up to 6 daily (79.8mg) from 24-48 hours after inoculation until asymptomatic or for 14 days N=NI (Arm-1=69, Arm-2=66, Arm-3=70)                                                                                          | from 24-48 hours after inoculation until asymptomatic or for 14 days N=NI (67)                                                                                               | 4. AEs: PRO assessed from day 1 of intervention for up to 14 days 19 days                                                                                                                                                                                                                                                                                                                                                                                 |
| Turner 2000 (B) <sup>12</sup>      | US Community Multi centre 4-arm RCT       | Healthy adults Age: 18-65 years Common cold: ≥ 2 of 10 symptoms for ≤ 36 hours, investigator assessed (N=281 randomised)   | Lozenge: Arm-1 zinc gluconate 13.3mg (Cold-Eeze®), Arm-2 zinc acetate 5mg, Arm-3 zinc acetate 11.5mg 1 every 2 waking hours up to 6 / day (79.8mg) until asymptomatic or for 14 days N=NI (Arm-1=68, Arm-2=72, Arm-3=68) | Placebo lozenge: unmatched, tannic acid, sucrose octaacetate, sugar, glucose syrup, quinine hydrochloride 1 every 2 waking hours until asymptomatic or for 14 days N=NI (71) | 1. Duration: time up to 14 days, until two consecutive symptom scores ≤1 within 24 hours<br>2. Severity: 7 symptoms, 0-4 scale, self-rated twice daily for up to 14 days<br>3. AEs: PRO assessed from day 1 for up to 14 days 14 days                                                                                                                                                                                                                     |
| Yao 2005 <sup>13</sup>             | China Multi-centre 2-arm RCT              | Healthy adults Age: 18-65 years (Zinc 37.3 ±13.1 yrs Control 35.9 ±13.2 yrs) Common cold: ≥ 2 of 8 symptoms for ≤ 36 hours | Nasal spray: zinc gluconate 1 spray every 2 hours 5 x day (zinc dose uncertain) for 3 days until asymptomatic or up to 5 days N=75 (70)                                                                                  | Nasal spray: naphazoline hydrochloride 2 sprays every 4 hours for 3 times daily for 3 days until asymptomatic or up to 5 days N=76 (73)                                      | 1. Duration: days until asymptomatic for each symptom, up to 5 days<br>2. Duration: number of participants asymptomatic for each symptom by day 5<br>3. Severity: 8 symptoms, 0-3 scale, self-rated daily for up to 5 days<br>4. Severity: number of participants ≥ 50% improvement in total symptom score over 5 days<br>5. AEs: Laboratory tests (blood and urine biochemistry, full blood count)<br>6. AEs: PRO assessed daily for up to 5 days 5 days |
| <b>TREATMENT ONLY</b>              |                                           |                                                                                                                            |                                                                                                                                                                                                                          |                                                                                                                                                                              |                                                                                                                                                                                                                                                                                                                                                                                                                                                           |
| <b>Zinc versus placebo control</b> |                                           |                                                                                                                            |                                                                                                                                                                                                                          |                                                                                                                                                                              |                                                                                                                                                                                                                                                                                                                                                                                                                                                           |
| Al Nakib 1987 (B) <sup>2 14</sup>  | UK Isolation unit Single centre 2-arm RCT | Healthy adults Age: 18-50 years HRV-2 inoculation Common cold: onset <24 hours after inoculation                           | Lozenge: 23mg zinc gluconate 1 every 2 waking hours up to 12 per day (276mg) from 24 hours after inoculation, for 6 days N=6 (6)                                                                                         | Placebo lozenge: citric acid, matched appearance. 1 every 2 waking hours from 24 hours after inoculation for 6 days N=6 (6)                                                  | 1. Severity: 4 symptoms, 0-3 scale, investigator rated on days 2-7<br>2. Severity: nasal mucus weight on days 2-7<br>3. Severity: total issue count on days 2-7<br>4. Severity: viral shedding on days 3 and 7<br>5. Severity: psychomotor performance assessed with 4-choice reaction time task before inoculation and when symptomatic. 7 days                                                                                                          |
| Belongia 2001 <sup>15</sup>        | US Community Single centre 2-arm RCT      | Healthy adults (Zinc 40 ±11 yrs. Control 38 ±11 yrs.) Common cold: 2 of 8 symptoms for 24 hours, or 1 symptom for ≤        | Nasal spray: zinc sulfate heptahydrate (isotonic) 0.011mg / spray 2 sprays 4 x day (0.09mg)                                                                                                                              | Placebo nasal spray: matched excipients 2 sprays 4 x day until asymptomatic or for 14 days N=79 (79)                                                                         | 1. Duration: days until symptom score ≤ 1 for 2 consecutive days, up to 14 days<br>2. Severity: 8 symptoms, 0-3 scale, <sup>10</sup> self-rated twice daily for up to 14 days                                                                                                                                                                                                                                                                             |

|                               |                                                      |                                                                                                                                                                                                                                                                                                                                                                           |                                                                                                                                                                                                                                                                                                                                        |                                                                                                                                                                                                                                         |                                                                                                                                                                                                                                                                                                                                                                                                                                                                                                                                                                                                |
|-------------------------------|------------------------------------------------------|---------------------------------------------------------------------------------------------------------------------------------------------------------------------------------------------------------------------------------------------------------------------------------------------------------------------------------------------------------------------------|----------------------------------------------------------------------------------------------------------------------------------------------------------------------------------------------------------------------------------------------------------------------------------------------------------------------------------------|-----------------------------------------------------------------------------------------------------------------------------------------------------------------------------------------------------------------------------------------|------------------------------------------------------------------------------------------------------------------------------------------------------------------------------------------------------------------------------------------------------------------------------------------------------------------------------------------------------------------------------------------------------------------------------------------------------------------------------------------------------------------------------------------------------------------------------------------------|
| Douglas<br>1987 <sup>16</sup> | Australia<br>Community<br>Single centre<br>2-arm RCT | 48 hours<br>(Rhinovirus n=6,<br>Parainfluenza<br>virus n=1,<br>Respiratory<br>syncytial virus<br>n=2)<br><i>Medications</i><br>n=91<br>Healthy adults<br>(Zinc 30.7 yrs.<br>Control 35.6 yrs.)<br>URTI: ≥ 2 of 8<br>symptoms for 24<br>hours, or 1<br>symptom for 48<br>hrs<br>(Rhinovirus n=6,<br>Influenza A n=2,<br>Adenovirus n=1,<br>negative viral<br>culture n=51) | <i>until asymptomatic<br/>or for 14 days</i><br>N=81 (81)<br>Lozenge: 10mg zinc<br>acetate (tartaric<br>acid, sodium<br>bicarbonate)<br>1 every 2 waking<br>hours<br>up to 8 per day<br>(80mg)<br>Av. daily dose:<br>~64mg <sup>17</sup><br><i>from symptom<br/>onset for 3 days<br/>until asymptomatic<br/>or 6 days</i><br>N=35 (33) | Placebo lozenge:<br>sodium acetate<br>1 every 2 waking<br>hours<br><i>from symptom<br/>onset for 3 days<br/>until asymptomatic<br/>or 6 days</i><br>N=35 (30)                                                                           | 3. Severity: daily decongestant<br>medication over 14 days or until<br>asymptomatic<br>4. Medication use: decongestants,<br>cough medicines, combination cold<br>medication over 14 days<br>4. AEs: PRO assessed twice daily up to<br>14 days<br>14 days<br>1. Duration: days until asymptomatic<br>2. Severity: 8 symptoms, 0-3 scale, <sup>10</sup><br>self-rated daily for 3 days until<br>asymptomatic or up to 6 days<br>3. Duration: days with symptoms over<br>6 months (winter in 1984)<br>4. AEs: PRO assessed on day 14<br>following each RTI episode and at 6<br>months<br>6 months |
| Eby<br>1984 <sup>18</sup>     | US<br>Community<br>Single centre<br>2-arm RCT        | Healthy children<br>& adults<br>Age: 11-62 years<br>(Zinc: 35.6 ±2.2<br>yrs. Control: 38<br>±2.8 yrs.)<br>UTRI: symptoms<br>≤ 72 hours,<br>physician<br>diagnosed                                                                                                                                                                                                         | Lozenge: 23mg zinc<br>gluconate<br>(dicalcium<br>phosphate,<br>cellulose, sodium<br>starch glycolate,<br>magnesium<br>stearate)<br>2 every 2 waking<br>hours up to 12 daily<br>(276mg)<br>Av. daily<br>dose:~207mg <sup>17</sup><br><i>until asymptomatic<br/>for 6 hours or for 7<br/>days</i><br>N=54 (37)                           | Placebo lozenge:<br>matched<br>appearance,<br>excipients<br>2 every 2 waking<br>hours up to 12 daily<br><i>until asymptomatic<br/>for 6 hours or for 7<br/>days</i><br>N=39 (28)                                                        | 1. Duration: days until asymptomatic,<br>up to 7 days<br>2. Severity: 10 symptoms, 0-3 scale,<br>self-rated daily for up to 7 days<br>(results not reported)<br>3. AEs: PRO assessed daily for up to 7<br>days, reviewed by physician at day 7<br>7 days                                                                                                                                                                                                                                                                                                                                       |
| Eby<br>2006 <sup>19</sup>     | US<br>Community<br>Single centre<br>2-arm RCT        | Healthy older<br>children & adults<br>Age: 9-66 years<br>(Zinc 38.8 yrs.<br>Control 37.4 yrs.)<br>Common cold:<br>≥2 of 10<br>symptoms and<br>≥1 nasal<br>symptom, for ≤<br>72 hours,<br>physician<br>diagnosed                                                                                                                                                           | Lozenge: 37mg zinc<br>orotate and<br>Nasal spray: zinc<br>gluconate 10mM /<br>spray<br>1 lozenge every 2 -<br>3 hours and 6<br>sprays every 15 - 30<br>minutes when<br>awake (300mg)<br><i>until asymptomatic<br/>or for 7 days</i><br>N = 25 (17)                                                                                     | Placebo lozenge:<br>calcium lactate,<br>matched for<br>appearance,<br>excipients<br>1 lozenge every 2 - 3<br>hours and 6 sprays<br>every 15 - 30<br>minutes when<br>awake<br><i>until asymptomatic<br/>or for 7 days</i><br>N = 22 (16) | 1. Duration: days until asymptomatic,<br>up to 7 days<br>2. Severity: 10 symptoms, 0-3 scale,<br>self-rated daily for up to 7 days<br>3. AEs: PRO assessed for up to 6 days,<br>reviewed by physician at 7 days<br>7 days                                                                                                                                                                                                                                                                                                                                                                      |
| Godfrey<br>1992 <sup>20</sup> | US<br>Community<br>Single centre<br>2-arm RCT        | Healthy adults<br>Age 18-40 years<br>(median age Zinc<br>21.2 yrs. Control<br>20.1 yrs.)<br>Common cold:<br>health<br>practitioner<br>diagnosed                                                                                                                                                                                                                           | Lozenge: 23.7mg<br>zinc gluconate<br>(glycine, tannic<br>acid)<br>1 every 2 waking<br>hours up to 8 daily<br>(189.6mg)<br>Av. daily dose:<br>192mg                                                                                                                                                                                     | Placebo lozenge:<br>matched<br>appearance, flavour,<br>excipients<br>1 every 2 waking<br>hours up to 8 daily<br><i>until asymptomatic<br/>for 48 hours or for<br/>10 days</i>                                                           | 1. Duration: days until asymptomatic,<br>up to 10 days<br>2. Severity: 10 symptoms, 0-3 scale,<br>self-rated daily for up to 10 days<br>3. AEs: PRO assessed daily for up to<br>ten days<br>10 days                                                                                                                                                                                                                                                                                                                                                                                            |

|                           |                                                    |                                                                                                                                                                                                                                                       |                                                                                                                                                                                                                                                                               |                                                                                                                                                                                                                    |                                                                                                                                                                                                                                                                                                                                                                                                                                                                                 |
|---------------------------|----------------------------------------------------|-------------------------------------------------------------------------------------------------------------------------------------------------------------------------------------------------------------------------------------------------------|-------------------------------------------------------------------------------------------------------------------------------------------------------------------------------------------------------------------------------------------------------------------------------|--------------------------------------------------------------------------------------------------------------------------------------------------------------------------------------------------------------------|---------------------------------------------------------------------------------------------------------------------------------------------------------------------------------------------------------------------------------------------------------------------------------------------------------------------------------------------------------------------------------------------------------------------------------------------------------------------------------|
| Hemilä 2020 <sup>21</sup> | Finland<br>Community<br>Single centre<br>2-arm RCT | Healthy adults<br>(Zinc 48 ±9 yrs.<br>Control 46 ±10 yrs.)<br>Common cold:<br>self-determined<br>History ≥ 1<br>cold/winter<br>Asthma n=27                                                                                                            | ≤ 48 hours<br>symptoms<br><br>until asymptomatic<br>for 48 hours or for<br>10 days<br>N=43 (35)<br>Lozenge: 13mg zinc<br>acetate<br>(isomaltulose,<br>sorbitol,<br>magnesium<br>stearate, sucralose)<br>up to 6 daily (78mg)<br>from symptom<br>onset for 5 days<br>N=45 (45) | N=42 (28)<br>Placebo lozenge:<br>sucrose octa-<br>acetate matched<br>appearance, flavour.<br>up to 6 daily<br>from symptom<br>onset for 5 days<br>N=42 (42)                                                        | 1. Duration: days until symptom<br>severity score 1 or 0 (12 symptoms, 0-<br>3 scale, self-rated daily), up to 10 days<br>or until asymptomatic)2. Fever<br>≥37.5°C any time during the day) (Yes<br>/ No), up to 2wks***<br>3. Sickness absence from work, up to<br>1 month***<br>4. Antibiotic, asthma medication use,<br>up to 1 month***<br>5. Complications: sinusitis, bronchitis,<br>otitis, up to 1 month***<br>6. AEs: PRO assessed daily up to 10<br>days<br>1 months |
| Hirt 2000 <sup>22</sup>   | US<br>Community<br>Single centre<br>2-arm RCT      | Healthy adults<br>Common cold: ≥<br>3 of 9 symptoms<br>for ≤ 24 hours                                                                                                                                                                                 | Nasal gel: zinc<br>gluconate (Zicam®)<br>33 mM<br>120 µL / squirt<br>2 squirts 4 x day<br>(2.1mg)<br>until asymptomatic<br>or for 14 days<br>N=108 (108)                                                                                                                      | Placebo nasal gel:<br>matched<br>appearance,<br>excipients<br>2 squirts 4 x day<br>until asymptomatic<br>or for 14 days<br>N=105 (105)                                                                             | 1. Duration: days until asymptomatic,<br>up to 14 days<br>2. Severity: 9 symptoms, 0-3 scale,<br>self-rated daily (results not reported)<br>3. AEs: PRO assessed daily up to 14<br>days<br>14 days                                                                                                                                                                                                                                                                              |
| Mossad 1996 <sup>23</sup> | US<br>Community<br>Single centre<br>2-arm RCT      | Healthy adults<br>Age: 21-69 years<br>(Zinc 37.9 ±9.2<br>yrs. Control 37.5<br>±7.5 yrs.)<br>Common cold: ≥<br>2 of 10<br>symptoms for ≤<br>24 hours                                                                                                   | Lozenge: 13.3mg<br>zinc gluconate<br>tri-hydrate (glycine,<br>amino-acetic acid).<br>1 every 2 waking<br>hours, ≥4 daily<br>(≥53.2mg)<br>Av. daily dose:<br>~79.8mg,<br>until asymptomatic<br>or for 18 days<br>N=50 (50)                                                     | Placebo lozenge:<br>matched<br>appearance, flavour,<br>calcium lactate<br>pentahydrate<br>1 every 2 waking<br>hours, until<br>asymptomatic or for<br>18 days<br>N=50 (50)                                          | 1. Duration: days until symptom score<br>≤1, up to 18 days<br>2. Severity: 10 symptoms, 0-3 scale,<br>self-rated daily for up to 18 days<br>3. Medication use: paracetamol use<br>whilst symptomatic<br>4. AEs: PRO assessed daily and within<br>one day of being asymptomatic up to<br>18 days<br>18 days                                                                                                                                                                      |
| Mossad 2003 <sup>24</sup> | US<br>Community<br>Single centre<br>2-arm RCT      | Healthy adults<br>Age: 21-40 years<br>(median: Zinc 29<br>yrs. Control 26<br>yrs.)<br>Common cold: ≤<br>48 hours<br>symptoms,<br>physician<br>diagnosis<br>(Rhinovirus n=27,<br>Parainfluenza<br>n=1,<br>Influenza n=2, no<br>virus isolated<br>n=48) | Nasal gel: zinc<br>gluconate (Zicam®)<br>33 mM<br>120 µL / squirt<br>2 squirts 4 x day<br>(2.1mg)<br>plus paracetamol if<br>needed for<br>temperature<br>control<br>until asymptomatic<br>for 48 hours or for<br>10 days<br>N=40 (40)                                         | Placebo nasal gel:<br>matched<br>appearance &<br>excipients<br>2 squirts 4 x days<br>plus paracetamol if<br>needed for<br>temperature control<br>until asymptomatic<br>for 48 hours or for<br>10 days<br>N=40 (38) | 1. Duration: days until asymptomatic,<br>up to 10 days<br>2. Severity: 10 symptoms, self-rated<br>0-3 <sup>10</sup> twice daily until symptom<br>resolution or up to 10 days<br>3. Medication use: paracetamol and<br>other cold medication use over 10<br>days<br>4. AEs: PRO assessed daily for up to<br>10 days and at exit interview<br>10 days                                                                                                                             |
| Petrus 1998 <sup>25</sup> | US<br>Community<br>Single centre<br>2-arm RCT      | Healthy adults<br>Age: 18-54 years<br>(Zinc 26.7 ±1.3<br>yrs. Control 26.2<br>±1.2 yrs.)<br>Common cold: ≥<br>2 of 11                                                                                                                                 | Lozenge: 9mg zinc<br>acetate (dextralose)<br>1 every 1.5 waking<br>hours for 1 day,<br>then second hourly<br>Av. daily dose: ~<br>89.1mg                                                                                                                                      | Placebo lozenge:<br>sucrose octa-<br>acetate matched<br>appearance, flavour.<br>1 every 1.5 waking<br>hours for 1 day,<br>then second hourly                                                                       | 1. Duration: days until asymptomatic,<br>up to 14 days<br>2. Severity: 11 symptoms, 0-3 scale,<br>self-rated daily for up to 14 days<br>3. AEs: PRO assessed daily up to 14<br>days<br>14 days                                                                                                                                                                                                                                                                                  |

|                                |                                                      |                                                                                                                                                           |                                                                                                                                                                                                                                                                   |                                                                                                                                                                                                                                                                        |                                                                                                                                                                                                                                                                                                                                                                 |
|--------------------------------|------------------------------------------------------|-----------------------------------------------------------------------------------------------------------------------------------------------------------|-------------------------------------------------------------------------------------------------------------------------------------------------------------------------------------------------------------------------------------------------------------------|------------------------------------------------------------------------------------------------------------------------------------------------------------------------------------------------------------------------------------------------------------------------|-----------------------------------------------------------------------------------------------------------------------------------------------------------------------------------------------------------------------------------------------------------------------------------------------------------------------------------------------------------------|
| Prasad<br>2000 <sup>26</sup>   | US<br>Community<br>Single centre<br>2-arm RCT        | Healthy adults<br>Age: >18 years<br>(Zinc 36.4 ±11.1<br>yrs. Control 37.8<br>±10.9 yrs)<br>Common cold: ≥<br>2 of 11<br>symptoms for ≤<br>24 hours        | symptoms,<br>duration not<br>reported<br>Lozenge: 12.8mg<br>zinc acetate<br>dihydrate (silica gel,<br>dextrose, glycerol<br>monostearate) 1<br>every 2-3 waking<br>hours<br>Av. daily dose:<br>~80mg<br><i>until asymptomatic<br/>or for 12 days</i><br>N=25 (25) | <i>until asymptomatic<br/>or for 14 days</i><br>N=49 (48)<br>Placebo lozenge:<br>sucrose octa<br>acetate, matched<br>for flavour, texture,<br>appearance,<br>excipients. 1 every<br>2-3 waking hours <i>for<br/>until asymptomatic<br/>or for 12 days</i><br>N=25 (23) | 1. Duration: days until asymptomatic,<br>up to 12 days<br>2. Severity: 11 symptoms, 0-3 scale,<br>self-rated daily for up to 12 days<br>3. Severity: plasma cytokines day 1,<br>and when asymptomatic or day 12<br>4. Serum zinc day 1 and when<br>asymptomatic or day 12<br>5. AEs: PRO assessed at trial exit<br>interview: asymptomatic or day 12<br>12 days |
| Prasad<br>2008 <sup>27</sup>   | US<br>Community<br>Single centre<br>2-arm RCT        | Healthy adults<br>Age: >18 years<br>(Zinc: 34.5 ±14.1<br>yrs. Control 35.5<br>±13.4 yrs)<br>Common cold: ≥<br>2 of 10<br>symptoms for ≤<br>24 hours       | Lozenge: 13.3mg<br>zinc acetate<br>(sucrose, corn<br>syrup) 1 every 2-3<br>waking hours<br>Av. daily dose:<br>~92mg<br><i>until asymptomatic<br/>or for 8 days</i><br>N=25 (25)                                                                                   | Placebo lozenge:<br>octa-acetate,<br>matched for<br>appearance, flavour,<br>excipients. 1 every<br>2-3 waking hours,<br><i>until asymptomatic<br/>or for 8 days</i><br>N=25 (25)                                                                                       | 1. Duration: days until symptom score<br>≤1, up to 8 days<br>2. Severity: 10 symptoms, 0-3 scale,<br>self-rated daily for up to 8 days<br>3. Severity: plasma cytokines: day 1,<br>asymptomatic or day 8<br>4. Serum zinc day 1, asymptomatic or<br>day 8<br>5. AEs: PRO assessed at trial exit:<br>asymptomatic or day 8<br>8 days                             |
| Smith<br>1989 <sup>28</sup>    | US<br>Community<br>Single centre<br>2-arm RCT        | Healthy adults<br>Age: >18 years<br>(Zinc 26.7 ±1.3<br>yrs. Control: 26.2<br>±1.2 yrs.)<br>Acute URTI:<br>clinical diagnosis,<br>duration not<br>reported | Lozenge: 11.5mg<br>zinc gluconate<br>(mannitol, sorbitol)<br>4 stat, then 1 every<br>2 waking hours (≥<br>115mg daily)<br><i>until asymptomatic<br/>or for 7 days</i><br>N=88 (53)                                                                                | Placebo lozenge:<br>unmatched<br>4 stat, then 1 every<br>2 waking hours<br><i>until asymptomatic<br/>or for 7 days</i><br>N=86 (57)                                                                                                                                    | 1. Duration: days until asymptomatic,<br>up to 7 days<br>2. Severity: 11 symptoms, 0-3 scale,<br>self-rated daily for up to 7 days<br>3. AEs: PRO assessed daily for up to 7<br>days<br>7 days                                                                                                                                                                  |
| Weismann<br>1990 <sup>29</sup> | Denmark<br>Community<br>Single centre<br>Quasi-RCT** | Healthy adults<br>Age: 18-65 years<br>Common cold: ≤<br>24 hours; NI case<br>definition<br><i>History of<br/>common cold in<br/>cold season</i>           | Lozenge: 4.5mg zinc<br>gluconate (maltitol)<br>1 every 1-1.5<br>waking hours, up to<br>10 daily (45mg)<br><i>from symptom<br/>onset until<br/>asymptomatic or for<br/>10 days</i><br>N=77 (69)                                                                    | Placebo lozenge:<br>matched<br>appearance,<br>excipients<br>1 every 1-1.5 waking<br>hours, up to 10 daily<br><i>from symptom<br/>onset until<br/>asymptomatic or for<br/>10 days</i><br>N=68 (61)                                                                      | 1. Duration: days until asymptomatic,<br>up to 10 days<br>2. Severity: overall condition severity,<br>with 11cm VAS (visual analogue<br>scale), self-rated daily for 10 days<br>reviewed by physician at 10 days<br>3. AEs: PRO assessed daily for 10<br>days, reviewed by physician at 10<br>days<br>10 days                                                   |

\* *a priori* risks groups listed are people with low zinc status and/or increased SARS-CoV-2 morbidity risk; \*\* non-random allocation of participants to zinc or placebo study design confirmed by Hemilä 2011<sup>17</sup> who contacted the author; \*\*\* according to registered protocol NCT03309995, however, results were not reported. **AEs**: Adverse event; **sCCA**: completed cases analysed; **±SD**: standard deviation; **Av. daily dose**: calculated from the average number of lozenges taken by participants in the zinc group as reported in the manuscript or by Hemilä 2011<sup>17</sup> who contacted the authors. **CDC**: Centres for Disease Control and Prevention, United States; **HRV**: human rhinovirus; **NI**: no information; **PRO**: participant/patient reported outcome; **RD**: recommended dose **RCT**: randomised controlled trial; **URTI**: upper respiratory tract infection



Table 2: Funding of studies

| First author / year           | Funding: study                                                                                                                                                                                                                        | Funding: intervention / placebo                                                                                                                                                                     |
|-------------------------------|---------------------------------------------------------------------------------------------------------------------------------------------------------------------------------------------------------------------------------------|-----------------------------------------------------------------------------------------------------------------------------------------------------------------------------------------------------|
| Al Nakib 1987 <sup>2 14</sup> | NI: study conducted by the MRC Common Cold Unit, Salisbury, UK                                                                                                                                                                        | Donated by RBS Pharma, Milan                                                                                                                                                                        |
| Belongia 2001 <sup>15</sup>   | CNS Inc., Minneapolis, Minnesota                                                                                                                                                                                                      |                                                                                                                                                                                                     |
| Douglas 1987 <sup>16</sup>    | NI                                                                                                                                                                                                                                    | Supplied by Fauldings Ltd.                                                                                                                                                                          |
| Eby 1984 <sup>18</sup>        | NI: lead author owner of George Eby Research, US                                                                                                                                                                                      | Supplied by Truett Laboratories                                                                                                                                                                     |
| Eby 2006 <sup>19</sup>        | Lead author is owner of George Eby Research, US. No outside financial support. 1 year remaining of patent right for zinc acetate lozenges.                                                                                            |                                                                                                                                                                                                     |
| Farr 1987 <sup>9</sup>        | Supported in part by Bristol Myers Products, Hillside, New Jersey, US and scholarship awarded by Milbank Memorial Fund, New York, US                                                                                                  |                                                                                                                                                                                                     |
| Godfrey 1992 <sup>20</sup>    | Godfrey Science & Design, Inc., Huntingdon Valley, Pennsylvania, US. and a grant from Rorer Pharmaceutical Corp., Fort Washington, Pennsylvania, US.                                                                                  |                                                                                                                                                                                                     |
| Hemilä 2020 <sup>21</sup>     | Investigator-initiated trial NordForsk (75021)<br>Academy of Finland (311492)                                                                                                                                                         | Donated by the University Pharmacy, Helsinki, Finland.                                                                                                                                              |
| Hirt 2000 <sup>22</sup>       | NI                                                                                                                                                                                                                                    | NI                                                                                                                                                                                                  |
| Mossad 1996 <sup>23</sup>     | General Pediatrics Research Fund and Departments of infectious Diseases and General Pediatrics of the Cleveland Clinic Foundation, US. Godfrey, J.C. and N.J. gave input on study design, manuscript review.                          | Becton Dickinson, New Jersey, US supplied the digital thermometers.<br>Quigley Corporation Pennsylvania, US supplied the intervention and placebo. McNeil, Pennsylvania, US supplied acetaminophen. |
| Mossad 2003 <sup>24</sup>     | Gel Tech LLC, California, US. The company manufactures Zicam®. Authors state the company approved the publication, yet did not participate in the study design, analysis or reporting results.                                        |                                                                                                                                                                                                     |
| Petrus 1998 <sup>25</sup>     | Weider Nutrition International, Utah, US                                                                                                                                                                                              |                                                                                                                                                                                                     |
| Prasad 2000 <sup>26</sup>     | Grant support from George and Patsy Eby Research Foundation, US (Note: George Eby held US patent rights for the zinc acetate lozenges)                                                                                                |                                                                                                                                                                                                     |
| Prasad 2007 <sup>3</sup>      | NIH grant no. 5 RO1 A150698-04<br>Oral glass thermometers supplied by Becton Dickinson, California, US                                                                                                                                | Supplied by Labcatal Laboratories, Paris, France                                                                                                                                                    |
| Prasad 2008 <sup>27</sup>     | National Institutes of Health (grant 5 RO1 A150698-04); partial untied support by George and Patsy Eby Research Foundation, US to Wayne State University, US.                                                                         | George Eby (who also held the US patent rights for the zinc acetate lozenges)                                                                                                                       |
| Silk 2005 <sup>1</sup>        | NI                                                                                                                                                                                                                                    | NI                                                                                                                                                                                                  |
| Smith 1989 <sup>28</sup>      | Grant from McNeil Consumer Products Company, US.                                                                                                                                                                                      |                                                                                                                                                                                                     |
| Turner 2000 (A) <sup>12</sup> | Funded by Warner Lambert Consumer Healthcare and coordinated by New Jersey Research Testing Laboratories, Inc., in Hackensack, New Jersey, US                                                                                         |                                                                                                                                                                                                     |
| Turner 2000 (B) <sup>12</sup> | Funded by Warner Lambert Consumer Healthcare and coordinated by TKL Research, Inc., in Paramus, New Jersey, US                                                                                                                        |                                                                                                                                                                                                     |
| Turner 2001 <sup>11</sup>     | Gel Tech, LLC, Woodland Hills, California, US                                                                                                                                                                                         |                                                                                                                                                                                                     |
| Veverka 2009 <sup>5</sup>     | Air Force Office of Scientific Research                                                                                                                                                                                               |                                                                                                                                                                                                     |
| Wei 2009 <sup>7</sup>         | Army Medical Science and Technology Research in 'The Eleventh Five-Year Plan' Project (06G026), China                                                                                                                                 |                                                                                                                                                                                                     |
| Weismann 1990 <sup>29</sup>   | NI                                                                                                                                                                                                                                    | Supplied by Kirsten B. Stæhr, A/S Alfred Benzon, Helseholmen 1, DK-2650 Hvidovre.                                                                                                                   |
| Yao 2005 <sup>13</sup>        | NI                                                                                                                                                                                                                                    | NI                                                                                                                                                                                                  |
| Zhang 2009 <sup>8</sup>       | NI specific for funding. The study was conducted at Langfang Medical College, Hebei Province, China. Affiliation for first author was Chinese Center for Disease Control and Prevention, Chinese Field Epidemiology Training Program. |                                                                                                                                                                                                     |

NI: no information



Figure 1: Risk of bias for each outcome category

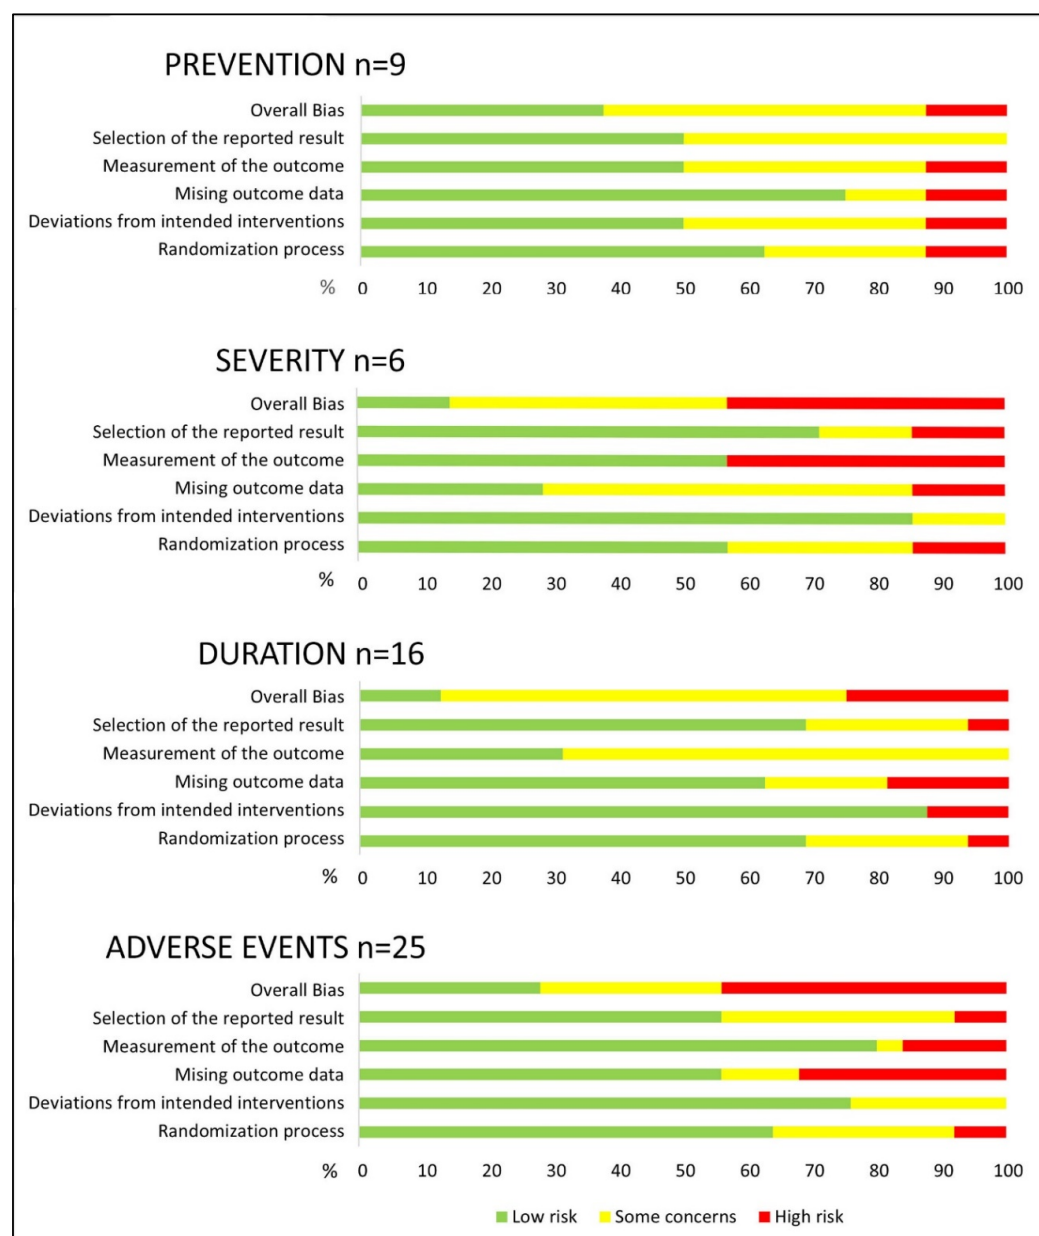

Table 3: Risk of bias for each study outcome

| (see footnote for details of prespecified additional considerations and parameters used for RoB 2.0 assessment <sup>30</sup> ) Study | Intervention                 | Control        | 1) Randomization process | 2) Deviations from intended interventions | 3) Missing outcome data | 4) Measurement of the outcome | 5) Selection of the reported result | OVERALL RISK OF BIAS | Comments                                                                                                                                                                                                                                              |
|--------------------------------------------------------------------------------------------------------------------------------------|------------------------------|----------------|--------------------------|-------------------------------------------|-------------------------|-------------------------------|-------------------------------------|----------------------|-------------------------------------------------------------------------------------------------------------------------------------------------------------------------------------------------------------------------------------------------------|
| AlNakib 1984 (A) <sup>2</sup>                                                                                                        | Sublingual lozenge / placebo | Prevention     | Low                      | Low                                       | Low                     | Low                           | Low                                 | Low                  |                                                                                                                                                                                                                                                       |
| AlNakib 1984 (B) <sup>2</sup>                                                                                                        | Sublingual lozenge / placebo | Prevention     | Low                      | Low                                       | Low                     | Low                           | Low                                 | Low                  |                                                                                                                                                                                                                                                       |
| AlNakib 1984 (C) <sup>2</sup>                                                                                                        | Sublingual lozenge / placebo | Adverse events | Low                      | Low                                       | Low                     | Low                           | High                                | High                 | 5) Non-specific results were narrated only, no numerical data reported                                                                                                                                                                                |
| Belongia 2001 <sup>15</sup>                                                                                                          | Nasal spray / placebo        | Adverse events | Low                      | Low                                       | Low                     | Low                           | Low                                 | Low                  |                                                                                                                                                                                                                                                       |
| Belongia 2001 <sup>15</sup>                                                                                                          | Nasal gel / placebo          | Duration       | Low                      | Low                                       | Low                     | Low                           | Low                                 | Low                  |                                                                                                                                                                                                                                                       |
| Belongia 2001 <sup>15</sup>                                                                                                          | Nasal gel / placebo          | Severity       | Low                      | Low                                       | Some                    | Low                           | Low                                 | Some                 | 3) Low participant MOD (1/161), however, MOD for daily multiple severity PROM not reported                                                                                                                                                            |
| Douglas 1987 <sup>16</sup>                                                                                                           | Sublingual lozenge / placebo | Adverse events | Low                      | Some                                      | High                    | High                          | Low                                 | High                 | 2) mITT analysis for AE outcome; 15/55 assigned more than once so risk of residual effects, and then may self-prescribe if they think they received placebo. 3) High MOD: 8 participant MOD > 5 events. 4) Recall bias: AE assessed at 2 wks          |
| Douglas 1987 <sup>16</sup>                                                                                                           | Sublingual lozenge / placebo | Duration       | Low                      | High                                      | Some                    | Some                          | Low                                 | High                 | 2) Per-protocol analysis, 10% excluded from analysis for non-adherence. 3) Mod-low drop out; NI about MOD from symptom questionnaire. 4) Blinding OK; Higher AE in zinc group may unmask blinding, unlikely to bias subjective reporting of duration. |

|                            |                                            |                |      |     |      |      |      |      |                                                                                                                                                                                                                                                                                                                                                                                                                                                                                           |
|----------------------------|--------------------------------------------|----------------|------|-----|------|------|------|------|-------------------------------------------------------------------------------------------------------------------------------------------------------------------------------------------------------------------------------------------------------------------------------------------------------------------------------------------------------------------------------------------------------------------------------------------------------------------------------------------|
| Eby 1984 <sup>18</sup>     | Sublingual lozenge / placebo               | Adverse events | High | Low | High | Low  | High | High | 1) NI allocation concealment, enrolment on site, >10% more allocated to zinc group and higher symptom severity at baseline in placebo group. Correlation analysis for severity - no impact on duration, only partially reported. 3) High MOD ~34 participant MOD = 33 events; 5) Post hoc changes declared, yet still only reported some of the results in detail                                                                                                                         |
| Eby 1984 <sup>18</sup>     | Sublingual lozenge / placebo               | Duration       | High | Low | High | Some | High | High | 1) NI allocation concealment, enrolment on site, >10% more allocated to zinc group and higher symptom severity at baseline in placebo group; correlation analysis for severity only partially reported no impact on duration. 3) High MOD ~50% MOD. 4) Higher AE in zinc group may unmask blinding, subjective outcome, possible unmasking unlikely to overly bias ascertainment of symptom duration. 5) Post hoc changes declared, yet still only reported some of the results in detail |
| Eby 1984 <sup>18</sup>     | Sublingual lozenge / placebo               | Severity       | High | Low | High | High | High | High | 1) NI allocation concealment, enrolment on site, >10% more allocated to zinc group and higher symptom severity at baseline in placebo group. 3) High MOD ~50% MOD. 4) Higher AE in zinc group may unmask blinding, likely to bias subjective reporting of symptom severity. 5) Post hoc changes declared, yet still only reported some of the results in detail                                                                                                                           |
| Eby 2006 <sup>19</sup>     | Sublingual lozenge / placebo & nasal spray | Adverse events | Some | Low | High | Low  | Some | High | 1) NI about randomization schedule, allocation internal by one physician; no significant baseline differences. 3) High 30% MOD, AE for some dropouts included, however, MOD still greater than no. events. 5) no protocol.                                                                                                                                                                                                                                                                |
| Eby 2006 <sup>19</sup>     | Sublingual lozenge & nasal spray / placebo | Duration       | Some | Low | High | Some | Some | High | 1) NI about randomization schedule, allocation internal by one physician; no significant baseline differences. 3) High 50% MOD. 4) Blinding OK, Higher AE in zinc group may unmask blinding, unlikely to bias subjective reporting of duration. 5) no protocol                                                                                                                                                                                                                            |
| Farr 1987 (A) <sup>9</sup> | Sublingual lozenge / placebo               | Adverse events | Low  | Low | Low  | Low  | Low  | Low  |                                                                                                                                                                                                                                                                                                                                                                                                                                                                                           |
| Farr 1987 (A) <sup>9</sup> | Sublingual lozenge / placebo               | Prevention     | Low  | Low | Low  | Low  | Low  | Low  |                                                                                                                                                                                                                                                                                                                                                                                                                                                                                           |
| Farr 1987 (A) <sup>9</sup> | Sublingual lozenge / placebo               | Severity       | Low  | Low | Low  | Low  | Low  | Low  |                                                                                                                                                                                                                                                                                                                                                                                                                                                                                           |
| Farr 1987 (B) <sup>9</sup> | Sublingual lozenge / placebo               | Adverse events | Low  | Low | Low  | Low  | Low  | Low  |                                                                                                                                                                                                                                                                                                                                                                                                                                                                                           |
| Farr 1987 (B) <sup>9</sup> | Sublingual lozenge / placebo               | Prevention     | Low  | Low | Low  | Low  | Low  | Low  |                                                                                                                                                                                                                                                                                                                                                                                                                                                                                           |
| Godfrey 1992 <sup>20</sup> | Sublingual lozenge / placebo               | Adverse events | Low  | Low | Some | Low  | Low  | Some | 3) low-moderate MOD, 9 participant MOD, 34 events, however, unclear if 1 participant who dropped out due to nausea was included.                                                                                                                                                                                                                                                                                                                                                          |

|                            |                              |                |      |     |      |      |      |      |                                                                                                                                                                                                                                                                                                          |
|----------------------------|------------------------------|----------------|------|-----|------|------|------|------|----------------------------------------------------------------------------------------------------------------------------------------------------------------------------------------------------------------------------------------------------------------------------------------------------------|
| Godfrey 1992 <sup>20</sup> | Sublingual lozenge / placebo | Duration       | Low  | Low | Some | Some | Low  | Some | 3) Moderate participant MOD, similar between groups. 4) Blinding OK. Higher AE in zinc group may unmask blinding, unlikely to bias subjective reporting of duration.                                                                                                                                     |
| Hemilla 2020 <sup>21</sup> | Sublingual lozenge / placebo | Adverse events | Low  | Low | Low  | Low  | Low  | Low  |                                                                                                                                                                                                                                                                                                          |
| Hemilla 2020 <sup>21</sup> | Sublingual lozenge / placebo | Duration       | Low  | Low | Low  | Some | Low  | Some | 4) Blinding OK. Higher AE in zinc group may unmask blinding, however, sensitivity analysis no significant difference to result.                                                                                                                                                                          |
| Hirt 2000 <sup>22</sup>    | Nasal gel / placebo          | Adverse events | Some | Low | Low  | Low  | Low  | Some | 1) NI randomisation, concealment, and baseline differences.                                                                                                                                                                                                                                              |
| Hirt 2000 <sup>22</sup>    | Nasal gel / placebo          | Duration       | Some | Low | Low  | Low  | Low  | Some | 1) NI randomisation, concealment, and baseline differences.                                                                                                                                                                                                                                              |
| Mossad 1996 <sup>23</sup>  | Sublingual lozenge / placebo | Adverse events | Low  | Low | Low  | Low  | Low  | Low  |                                                                                                                                                                                                                                                                                                          |
| Mossad 1996 <sup>23</sup>  | Sublingual lozenge / placebo | Duration       | Low  | Low | Low  | Some | Low  | Some | 4) Blinding OK. Sensitivity analyses of non-adherence (High AE) - no change to results                                                                                                                                                                                                                   |
| Mossad 2003 <sup>24</sup>  | Nasal gel / placebo          | Adverse events | Low  | Low | Low  | Low  | Some | Some | 5) No protocol reported                                                                                                                                                                                                                                                                                  |
| Mossad 2003 <sup>24</sup>  | Nasal gel / placebo          | Duration       | Low  | Low | Low  | Low  | Some | Some | 5) No protocol reported                                                                                                                                                                                                                                                                                  |
| Petrus 1998 <sup>25</sup>  | Sublingual lozenge / placebo | Duration       | Some | Low | Low  | Some | Low  | Some | 1) NI randomisation and concealment details. No baseline differences between groups. 4) Adequacy of blinding not assessed. Higher AE in zinc group may unmask blinding, unlikely to bias subjective reporting of duration.                                                                               |
| Petrus 1998 <sup>25</sup>  | Sublingual lozenge / placebo | Severity       | Some | Low | Some | High | Low  | High | 1) NI randomisation and concealment details. No baseline differences between groups. 3) Low participant MOD, however, NI MOD for daily symptom severity PROM 4) Adequacy of blinding not assessed. Higher AE in zinc group may unmask blinding, likely to bias subjective reporting of symptom severity. |
| Prasad 2000 <sup>26</sup>  | Sublingual lozenge / placebo | Adverse events | Low  | Low | Low  | High | Low  | High | 4) Recall bias AEs only assessed at end of study                                                                                                                                                                                                                                                         |
| Prasad 2000 <sup>26</sup>  | Sublingual lozenge / placebo | Duration       | Low  | Low | Low  | Low  | Low  | Low  |                                                                                                                                                                                                                                                                                                          |
| Prasad 2000 <sup>26</sup>  | Sublingual lozenge / placebo | Severity       | Low  | Low | Some | Low  | Low  | Some | 3) NI MOD from multiple daily symptoms PROM                                                                                                                                                                                                                                                              |

|                               |                                             |                |      |      |      |      |      |      |                                                                                                                                                                                                         |
|-------------------------------|---------------------------------------------|----------------|------|------|------|------|------|------|---------------------------------------------------------------------------------------------------------------------------------------------------------------------------------------------------------|
| Prasad 2007 <sup>3</sup>      | Oral capsule / placebo                      | Adverse events | Some | Low  | Low  | Low  | Some | Some | 1) Random assignment in blocks of 2. Allocation concealed in sealed envelopes. NI about onsite or remotely administered allocation. 5) No reported protocol                                             |
| Prasad 2007 <sup>3</sup>      | Oral capsule / placebo                      | Prevention     | Some | Low  | Low  | Low  | Some | Some | 1) Random assignment in blocks of 2. Allocation concealed in sealed envelopes. NI about onsite or remotely administered allocation. 5) No reported protocol                                             |
| Prasad 2008 <sup>27</sup>     | Sublingual lozenge / placebo                | Adverse events | Low  | Low  | Low  | High | Some | High | 4) Recall bias AEs only assessed at end of study. 5) No protocol reported                                                                                                                               |
| Prasad 2008 <sup>27</sup>     | Sublingual lozenge / placebo                | Duration       | Low  | Low  | Low  | Low  | Some | Some | 5) No protocol reported                                                                                                                                                                                 |
| Prasad 2008 <sup>27</sup>     | Sublingual lozenge / placebo                | Severity       | Low  | Low  | Some | Low  | Some | Some | 3) NI MOD from multiple daily symptoms PROM. 5) No protocol reported                                                                                                                                    |
| Silk 2005 <sup>1</sup>        | Sublingual lozenge / placebo                | Adverse events | Some | Low  | High | Some | Some | High | 3) High MOD - 9 lost f/u, 11 events. 4) Recall bias for PROM only asked weekly, however, low risk of bias for clinical examinations and laboratory tests. 5) No protocol reported                       |
| Smith 1989 <sup>28</sup>      | Sublingual lozenge / placebo                | Adverse events | Low  | Low  | High | Low  | Low  | High | 2) mITT analysis for AE outcome 3) High MOD - 68 participant MOD, 34 events.                                                                                                                            |
| Smith 1989 <sup>28</sup>      | Sublingual lozenge / placebo                | Duration       | Low  | High | High | Some | Low  | High | 2) Per-protocol analysis, 38% excluded from analysis for non-adherence. 3) High MOD 39% 4) Blinding OK; Higher AE in zinc group may unmask blinding, unlikely to bias subjective reporting of duration. |
| Turner 2000 (A) <sup>12</sup> | Sublingual lozenge / matched active control | Adverse events | Low  | Low  | Low  | Low  | Low  | Low  |                                                                                                                                                                                                         |
| Turner 2000 (A) <sup>12</sup> | Sublingual lozenge / matched active control | Duration       | Low  | Low  | Low  | Some | Low  | Some | 4) Blinding OK. Higher AE in zinc group may unmask blinding, unlikely to bias subjective reporting of duration.                                                                                         |
| Turner 2000 (B) <sup>12</sup> | Sublingual lozenge / matched active control | Adverse events | Low  | Low  | Low  | Low  | Low  | Low  |                                                                                                                                                                                                         |
| Turner 2000 (B) <sup>12</sup> | Sublingual lozenge / matched active control | Duration       | Low  | Low  | Low  | Some | Low  | Some | 4) Blinding OK. Higher AE in zinc group may unmask blinding, unlikely to bias subjective reporting of duration.                                                                                         |
| Turner 2001 <sup>11</sup>     | Nasal gel / placebo                         | Adverse events | Some | Some | Low  | Low  | Low  | Some | 1) NI randomisation process or allocation concealment, no baseline differences. 2) per protocol analysis, however, only 1 participant excluded                                                          |

|                             |                                        |                |      |      |      |      |      |      |                                                                                                                                                                                                                                                                                                                                                                                                                                                                                                                                                                                              |
|-----------------------------|----------------------------------------|----------------|------|------|------|------|------|------|----------------------------------------------------------------------------------------------------------------------------------------------------------------------------------------------------------------------------------------------------------------------------------------------------------------------------------------------------------------------------------------------------------------------------------------------------------------------------------------------------------------------------------------------------------------------------------------------|
| Turner 2001 <sup>11</sup>   | Nasal gel / placebo                    | Prevention     | Some | Some | Low  | Some | Low  | Some | 1) NI randomisation process or allocation concealment, no baseline differences. 2) per protocol analysis, however, only 1 participant excluded. 4) Blinding OK. Higher AE in zinc group may unmask blinding, unlikely to bias ascertainment of any symptoms                                                                                                                                                                                                                                                                                                                                  |
| Turner 2001 <sup>11</sup>   | Nasal gel / placebo                    | Severity       | Some | Some | Low  | High | Low  | High | 1) NI randomisation process or allocation concealment, no baseline differences. 2) per protocol analysis, however, only 1 participant excluded 4) Blinding OK. Higher AE in zinc group may unmask blinding, could still bias subjective symptoms severity reporting.                                                                                                                                                                                                                                                                                                                         |
| Ververka 2009 <sup>5</sup>  | Oral capsule / placebo                 | Adverse events | High | Some | High | High | Some | High | 1) Quasi-randomised: last number of each cadet's social security number may reveal allocation to participants. 2) placebo group may self-prescribe OTC, serum zinc increased equally in both placebo and zinc groups suggesting possible non-protocol contamination, however, less likely to bias AE outcome 3) High MOD - 10 participant MOD, 9 events. 4) Except for 10 participants who dropped out, ascertainment of AE required participant to book consultation with physician 5) No protocol reported                                                                                 |
| Ververka 2009 <sup>5</sup>  | Oral capsule / placebo                 | Prevention     | High | High | High | High | Some | High | 1) Quasi-randomised: last number of each cadet's social security number may reveal allocation to participants. 2) placebo group may self-prescribe OTC, serum zinc increased equally in both placebo and zinc groups suggesting possible non-protocol contamination 3) High MOD - 10 participant MOD, 9 events. 4) Ascertainment of RTI required participant to book consultation with physician 5) No protocol reported                                                                                                                                                                     |
| Wei 2009 <sup>7</sup>       | Nasal spray / placebo                  | Adverse events | Low  | Some | High | Low  | Some | High | 2) per protocol analysis, no. excluded for non-adherence not reported. 3) High MOD: 128 participant MOD, 47 events, equal proportion groups. 5) No protocol reported                                                                                                                                                                                                                                                                                                                                                                                                                         |
| Wei 2009 <sup>7</sup>       | Nasal spray / placebo                  | Prevention     | Low  | Some | Some | Some | Some | Some | 2) per protocol analysis, no. excluded for non-adherence not reported. 3) Moderate MOD, 128 participant MOD, 255 events, equal proportion groups. 4) Adequacy of blinding not assessed. Higher AE in zinc group may unmask blinding, unlikely to bias subjective reporting of symptoms and ascertainment of infection. 5) No protocol reported                                                                                                                                                                                                                                               |
| Weismann 1990 <sup>29</sup> | Sublingual lozenge / placebo           | Adverse events | Some | Low  | Some | Low  | Low  | Some | 1) NI Randomisation and concealment. Interventions prepared externally so probably concealed and randomized; however, physicians were directly recruiting via their clinics. 3) Moderate MOD: 14 participant MOD, 36 events. Equal proportion groups.                                                                                                                                                                                                                                                                                                                                        |
| Weismann 1990 <sup>29</sup> | Sublingual lozenge / placebo           | Duration       | Some | Low  | Some | Some | Some | Some | 1) NI Randomisation and concealment. Interventions prepared externally so probably concealed and randomized; however, physicians were directly recruiting via their clinics. 3) Moderate-high 10% participant MOD, balanced groups. 4) Adequacy of blinding not assessed. Higher AE in zinc group could unmask blinding, unlikely to bias subjective reporting of duration. 5) Survival curve is presented in Fig 1. Inferential tests are not reported; however, the negative findings are narrated in detail, including "stressing that zinc did not shorten the duration of the disease." |
| Yao 2005 <sup>13</sup>      | Nasal spray / active control unmatched | Adverse events | Some | Some | High | Low  | Some | High | 1) NI about allocation concealment. 2) per protocol analysis, however, only 1/151 participants excluded non-adherence. 3) High MOD: 8 participant MOD, 8 events. 5) No protocol reported                                                                                                                                                                                                                                                                                                                                                                                                     |
| Zhang 2009 <sup>8</sup>     | Nasal spray / placebo                  | Adverse events | Low  | Some | Some | Low  | Some | Some | 2) per protocol analysis, NI no. excluded for non-adherence, however, overall MOD is low. 3) Moderate MOD: 55 participant MOD, 105 events, balanced between groups 5) No protocol reported                                                                                                                                                                                                                                                                                                                                                                                                   |
| Zhang 2009 <sup>8</sup>     | Nasal spray / placebo                  | Prevention     | Low  | Some | Low  | Some | Some | Some | 2) per protocol analysis, NI no. excluded for non-adherence, however, overall MOD is low. 4) Adequacy of blinding not assessed. Higher AE in zinc group may unmask blinding, unlikely to bias subjective reporting of infection. 5) No protocol reported                                                                                                                                                                                                                                                                                                                                     |

AE: adverse events; MOD: missing outcome data; mITT: modified intention to treat analysis; **Additional prespecified considerations and parameters used for the RoB 2.0 assessment.**<sup>30</sup>

**1. Randomisation process:** Q 1.2. *Allocation concealment:* (PN) block sizes of 2, 4, 6, or 8 and not remotely allocated; (PN) allocation on-site and no information about allocation concealment; (PN) allocated according to a number pre-known to investigators/participants (e.g. Military ID number, DoB, enrolment date). Q 1.3 *Imbalances suggest a problem:* (PY) Higher number of participants in the intervention arm (n>10%) and/or significant prognostic baseline characteristics favour the intervention (e.g. age, symptom severity at enrolment, history recurrent RTI, asthma, allergies, smoking) **2. Deviations from intended interventions:** Q 2.1 *Aware of allocation:* (PY) blinded, however, possible to guess (e.g. unmatched placebo/comparator OR difference in AEs for zinc sublingual/nasal – nose/mouth/taste symptoms, sublingual/oral zinc – nausea/GI symptoms) and adequacy of blinding was not assessed. Q 2.2 *Deviations from assignment not consistent with protocol:* Short-term non-serious RTI (PN) acute treatment, short-term prevention, as unlikely that participant would self-prescribe OTC zinc; Long-term non-serious RTI (PY) if contamination not assessed, or zinc levels not monitored as more incentive to self-prescribe OTC zinc; COVID-19 (PY or NI) higher risk of deviations from intended interventions due to seriousness of infection. If community setting: participant can easily access zinc or other OTC, and the fear of deterioration is a strong incentive to self-prescribe. If hospital setting: practitioners may prescribe pharmaceuticals not consistent with trial protocol. (PN) only if contamination/deviations reported and are low. Q 2.6 *Appropriate analysis:* (Y) intention-to-treat (ITT) or modified intention-to-treat (mITT) analysis. Q 2.7 *Impact of inappropriate analysis:* (Y, PY) if >5-10% participants inappropriately analysed/excluded especially if imbalanced, or rare outcome. **3. Missing outcome data (MOD)** Two types of MOD were considered. 1) MISSING PARTICIPANT DATA (MPD): for rare events: low MOD must have zero MPD; for common events/dichotomous/ categorical outcomes: low MOD no. events substantially higher than MPD, moderate MOD no. events at least double MPD, high MOD no. events almost equal to or less than MPD; for continuous outcomes: low MOD < 5% MPD, moderate MOD ≤10% MPD, high MOD >10% MPD. 2) MISSING DATA POINTS (MDP): if not reported and no sensitivity analysis for imputed data, assume low MOD for i) single question, ii) multiple questions asked only once, iii) multiple questions asked over multiple time-points when the response is recoded into binary outcome (e.g. symptomatic recovery, any adverse event, incidence), iv) daily symptom severity questions were collected by an investigator and the participant was on site in a dedicated trial setting (e.g. motel, research unit), or v) participants with incomplete data excluded from analysis (this is already accounted for in participant MOD). **4. Measurement of the outcome** Q 4.1 *Inappropriate measurement:* (PN) if symptom severity questionnaire unreferenced but description matches the validated assessment tool. Q 4.3 *Assessor aware:* see Q 2.1 re: adequacy of blinding for different zinc/control interventions. For participant reported adverse events (AEs) (N) if either adequacy of blinding was assessed and preserved, or the placebo intervention was matched. Q 4.5 *Likely to influence measurement:* Subjective clinical assessment (PN) double-blind study design (as unmasking of participants unlikely to bias), Participant reported outcomes (PRO) & partially matched control (PN) no difference in AEs; or higher AEs in zinc group, however, blinding tested and intact; (PN) sensitivity analysis. **5. Selection of the reported result:** Q 5.1 *Analysis according to protocol:* (Y) published pre-2002 and sufficient details reported in methods



## References

1. Silk R, LeFante C. Safety of zinc gluconate glycine (Cold-Eeze) in a geriatric population: a randomized, placebo-controlled, double-blind trial. *Am J Ther* 2005;12(6):612-7. doi: 10.1097/01.mjt.0000179115.04316.18 [published Online First: 2005/11/11]
2. Al-Nakib W, Higgins PG, Barrow I, et al. Prophylaxis and treatment of rhinovirus colds with zinc gluconate lozenges. *J Antimicrob Chemother* 1987;20(6):893-901. doi: 10.1093/jac/20.6.893 [published Online First: 1987/12/01]
3. Prasad AS, Beck FW, Bao B, et al. Zinc supplementation decreases incidence of infections in the elderly: effect of zinc on generation of cytokines and oxidative stress. *Am J Clin Nutr* 2007;85(3):837-44. doi: 10.1093/ajcn/85.3.837 [published Online First: 2007/03/09]
4. Bentley DW, Bradley S, High K, et al. Practice Guideline for Evaluation of Fever and Infection in Long-Term Care Facilities. *Clinical Infectious Diseases* 2000;31(3):640-53. doi: 10.1086/314013
5. Veverka DV, Wilson C, Martinez MA, et al. Use of zinc supplements to reduce upper respiratory infections in United States Air Force Academy cadets. *Complement Ther Clin Pract* 2009;15(2):91-5. doi: 10.1016/j.ctcp.2009.02.006 [published Online First: 2009/04/04]
6. Takkouche B, Regueira-Méndez C, García-Closas R, et al. Intake of vitamin C and zinc and risk of common cold: a cohort study. *Epidemiology* 2002;13(1):38-44. doi: 10.1097/00001648-200201000-00007 [published Online First: 2002/01/24]
7. Wei J, Chen HW, You LH. [Zinc gluconate nasal spray for the prevention of upper respiratory tract infection: A randomised, double-blinded, placebo-controlled trial]. *Medical Journal of Chinese People's Liberation Army* 2009;34(7):838-40.
8. Zhang LJ, Liu GX, Zhang YX, et al. [Zinc gluconate nasal spray for the prevention of acute upper respiratory tract infection]. *Journal of Preventive Medicine Information* 2009;25(7):508-10.
9. Farr BM, Conner EM, Betts RF, et al. Two randomized controlled trials of zinc gluconate lozenge therapy of experimentally induced rhinovirus colds. *Antimicrob Agents Chemother* 1987;31(8):1183-7. doi: 10.1128/aac.31.8.1183 [published Online First: 1987/08/01]
10. Jackson G, Dowling G, Spiesman H.F., Boand I.G., Arthur V. Transmission of the common cold to volunteers under controlled conditions: I. The common cold as a clinical entity. *AMA archives of internal medicine* 1958;101(2):267-78.
11. Turner RB. Ineffectiveness of intranasal zinc gluconate for prevention of experimental rhinovirus colds. *Clin Infect Dis* 2001;33(11):1865-70. doi: 10.1086/324347 [published Online First: 2001/11/03]
12. Turner RB, Cetnarowski WE. Effect of treatment with zinc gluconate or zinc acetate on experimental and natural colds. *Clinical infectious diseases : an official publication of the Infectious Diseases Society of America* 2000;31(5):1202-08.
13. Yao WZ, Yang W, Shen N, et al. [Zinc gluconate nasal spray versus common cold nasal spray in treating common cold: A randomised, multi-center, controlled trial]. *Chinese Journal of Clinical Pharmacology* 2005;21(2):87-90.
14. Smith AP, Tyrrell DA, Al-Nakib W, et al. Effects of zinc gluconate and nedocromil sodium on performance deficits produced by the common cold. *Journal of psychopharmacology (oxford, england)* 1991;5(3):251-54.
15. Belongia EA, Berg R, Liu K. A randomized trial of zinc nasal spray for the treatment of upper respiratory illness in adults. *The American journal of medicine* 2001;111(2):103-08.
16. Douglas RM, Miles HB, Moore BW, et al. Failure of effervescent zinc acetate lozenges to alter the course of upper respiratory tract infections in Australian adults. *Antimicrobial agents and chemotherapy* 1987;31(8):1263-65.
17. Hemilä H. Zinc lozenges may shorten the duration of colds: a systematic review. *The open respiratory medicine journal* 2011;5:51.
18. Eby GA, Davis DR, Halcomb WW. Reduction in duration of common colds by zinc gluconate lozenges in a double-blind study. *Antimicrob Agents Chemother* 1984;25(1):20-4. doi: 10.1128/aac.25.1.20 [published Online First: 1984/01/01]

19. Eby GA, Halcomb WW. Ineffectiveness of zinc gluconate nasal spray and zinc orotate lozenges in common-cold treatment: a double-blind, placebo-controlled clinical trial. *Altern Ther Health Med* 2006;12(1):34-8.
20. Godfrey JC, Conant Sloane B, Smith DS, et al. Zinc gluconate and the common cold: a controlled clinical study. *The Journal of international medical research* 1992;20(3):234-46.
21. Hemilä H, Haukka J, Alho M, et al. Zinc acetate lozenges for the treatment of the common cold: a randomised controlled trial. *BMJ open* 2020;10(1):e031662. doi: 10.1136/bmjopen-2019-031662
22. Hirt M, Nobel S, Barron E. Zinc nasal gel for the treatment of common cold symptoms: a double-blind, placebo-controlled trial. *Ear Nose Throat J* 2000;79(10):778-80, 82. [published Online First: 2000/10/31]
23. Mossad SB, Macknin ML, Medendorp SV, et al. Zinc gluconate lozenges for treating the common cold. A randomized, double-blind, placebo-controlled study. *Ann Intern Med* 1996;125(2):81-8. doi: 10.7326/0003-4819-125-2-199607150-00001 [published Online First: 1996/07/15]
24. Mossad SB. Effect of zincum gluconicum nasal gel on the duration and symptom severity of the common cold in otherwise healthy adults. *QJM : monthly journal of the Association of Physicians* 2003;96(1):35-43. doi: 10.1093/qjmed/hcg004
25. Petrus EJ, Lawson KA, Bucci LR, et al. Randomized, double-masked, placebo-controlled clinical study of the effectiveness of zinc acetate lozenges on common cold symptoms in allergy-tested subjects. *Current therapeutic research, clinical and experimental* 1998;59(9):595-607. doi: 10.1016/S0011-393X(98)85058-3
26. Prasad AS, Fitzgerald JT, Bao B, et al. Duration of symptoms and plasma cytokine levels in patients with the common cold treated with zinc acetate. A randomized, double-blind, placebo-controlled trial. *Annals of Internal Medicine* 2000;133(4):245-16.
27. Prasad AS, Beck FW, Bao B, et al. Duration and severity of symptoms and levels of plasma interleukin-1 receptor antagonist, soluble tumor necrosis factor receptor, and adhesion molecules in patients with common cold treated with zinc acetate. *J Infect Dis* 2008;197(6):795-802. doi: 10.1086/528803 [published Online First: 2008/02/19]
28. Smith DS, Helzner EC, Nuttall CE, Jr., et al. Failure of zinc gluconate in treatment of acute upper respiratory tract infections. *Antimicrobial agents and chemotherapy* 1989;33(5):646-48.
29. Weismann K, Jakobsen JP, Weismann JE, et al. Zinc gluconate lozenges for common cold. A double-blind clinical trial. *Dan Med Bull* 1990;37(3):279-81. [published Online First: 1990/06/01]
30. Sterne JA, Savović J, Page MJ, et al. RoB 2: a revised tool for assessing risk of bias in randomised trials. *BMJ* 2019;366
